# Supplementary material for: Growth, Physiology and Nutritional Quality of C4 Halophyte Portulaca oleracea L. Grown Aeroponically in Different Percentages of Artificial Seawater under Different Light-Emitting Diode Spectral Qualities
Source: MDPI journal article supplement (doi:10.3390/plants12183214), 2023-09-08
Supplement: s1 [file s1]

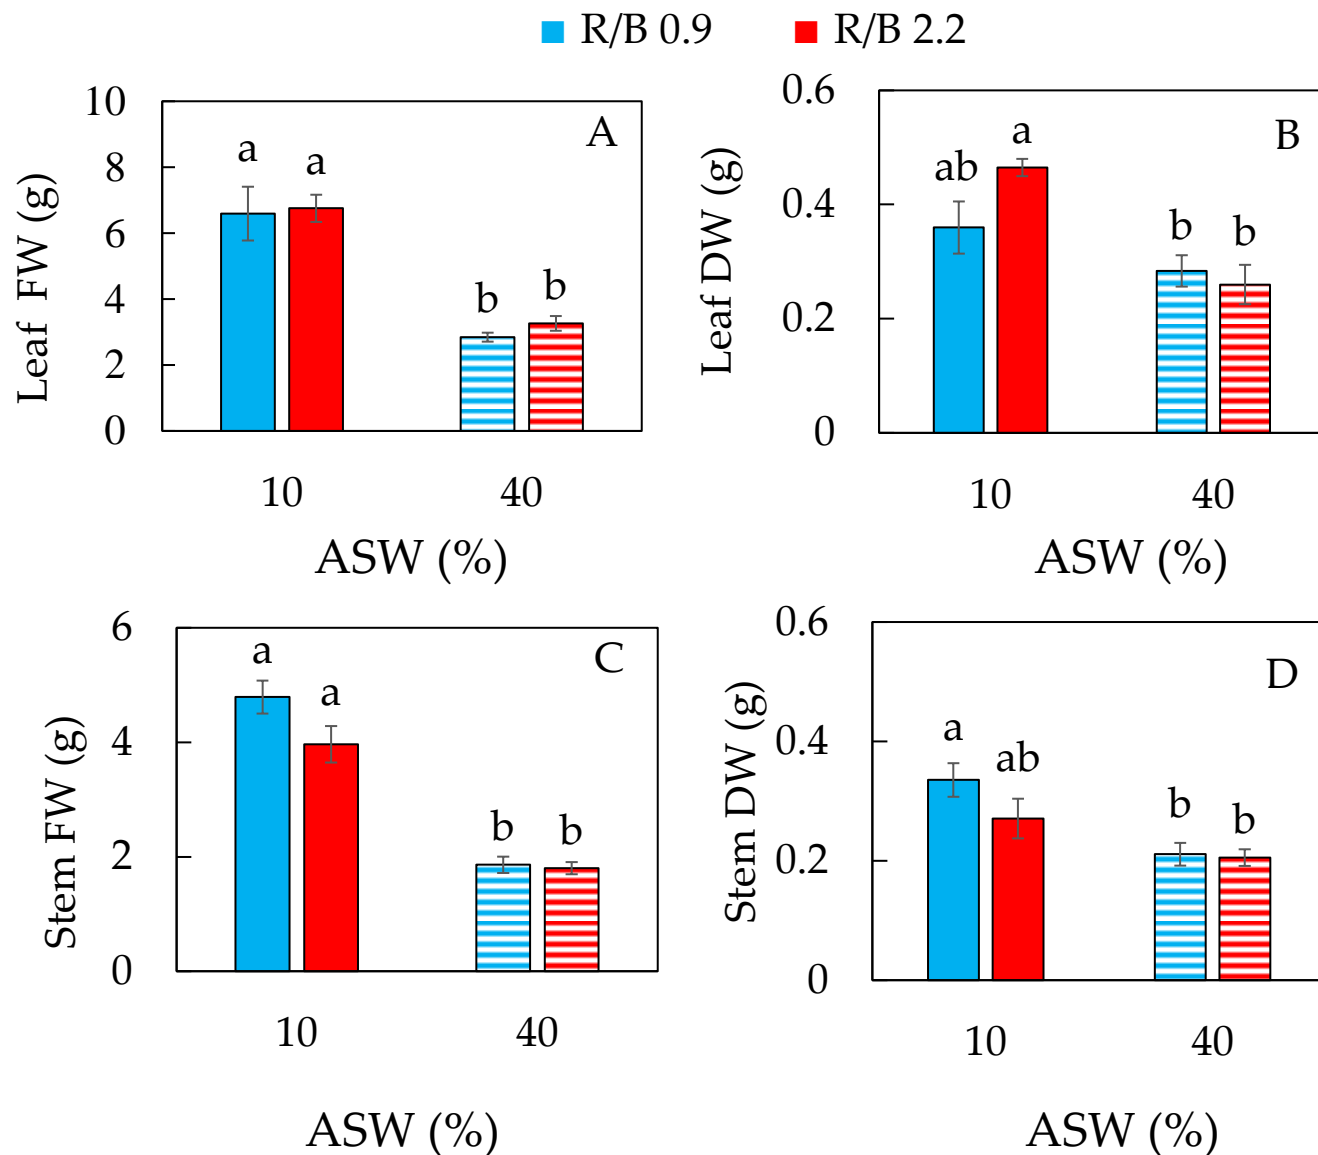

**Figure 1S.** Leaf FW (A), leaf DW (B), stem FW (C), stem DW (D) of purslane grown in two different percentages of artificial seawater (ASW) under two different LED R/B ratios for 14 days. Values are means  $\pm$  standard error of 4 different plants. Means with different letters above the column represent significant differences according to Tukey's multiple comparison test ( $p < 0.05$ ).

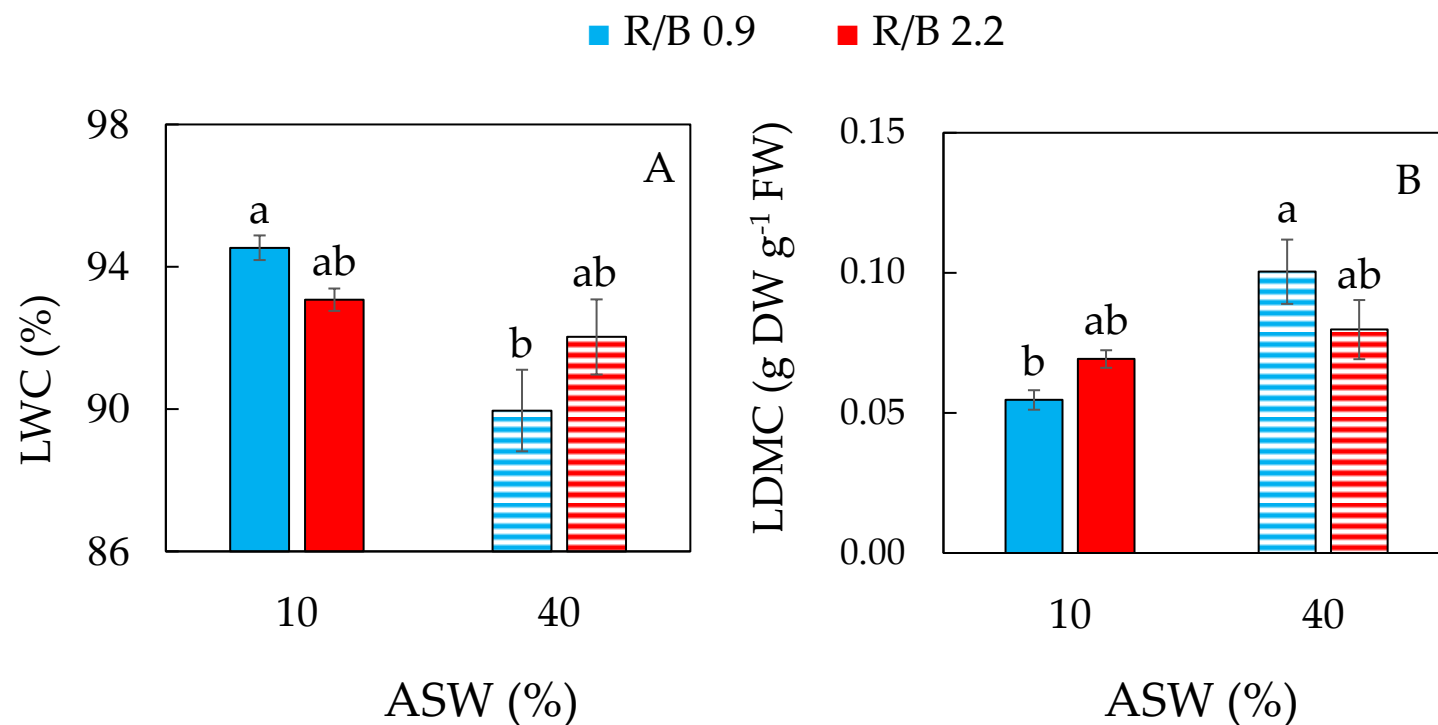

**Figure 2S.** Leaf water content, LWC (A) and leaf dry matter content, LDMC (B) of purslane grown in two different percentages of artificial seawater (ASW) under two different LED R/B ratios for 14 days. Values are means  $\pm$  standard error of 4 different plants. Means with different letters above the column represent significant differences according to Tukey's multiple comparison test ( $p < 0.05$ ).
